# Supplementary material for: Assessment of Three Recycling Pathways for Waste Cooking Oil as Feedstock in the Production of Biodiesel, Biolubricant, and Biosurfactant: A Multi-Criteria Decision Analysis Approach
Source: MDPI journal article supplement (doi:10.3390/recycling8040064), 2023-08-20
Supplement: s1 [file s1]

Archive with 1 entries (1 files):
- recycling-2411404-supplementary.pdf
