# Supplementary material for: Assessment of Three Recycling Pathways for Waste Cooking Oil as Feedstock in the Production of Biodiesel, Biolubricant, and Biosurfactant: A Multi-Criteria Decision Analysis Approach
Source: MDPI journal article supplement (doi:10.3390/recycling8040064), 2023-08-20
Supplement: s1 [file s1 › recycling-2411404-supplementary.pdf]

## Supplementary Material

The following Tables and Figures report the completed alternative matrix, along with Priority Scale, weights vector and solved alternative matrix for each decision-maker.

### Decision-maker 1

**Table S1.** Completed alternative matrix for Decision-maker 1

| Alternatives     | Evaluation criteria |                |            |               |
|------------------|---------------------|----------------|------------|---------------|
|                  | C1-Management       | C2-Environment | C3-Economy | C4-Efficiency |
| A1_Biodiesel     | 2                   | 2              | 1          | 1             |
| A2_Biolubricant  | 1                   | 3              | 1          | 1             |
| A3_Biosurfactant | 3                   | 3              | 3          | 3             |

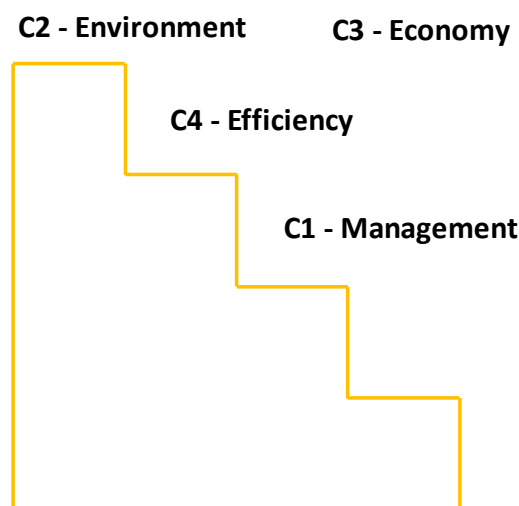

**Figure S1.** Priority Scale for Decision-maker 1

**Table S2.** Weights vector for Decision-maker 1

| Weights vector | Evaluation criteria |                |            |               |
|----------------|---------------------|----------------|------------|---------------|
|                | C1-Management       | C2-Environment | C3-Economy | C4-Efficiency |
| Values         | 0.1                 | 0.35           | 0.35       | 0.2           |

**Table S3.** Solved alternative matrix and Priority index for Decision-maker 1

| Alternatives     | Evaluation criteria |                |            |               | Priority index |
|------------------|---------------------|----------------|------------|---------------|----------------|
|                  | C1-Management       | C2-Environment | C3-Economy | C4-Efficiency |                |
| A1_Biodiesel     | 0.2                 | 0.7            | 0.35       | 0.2           | 1.45           |
| A2_Biolubricant  | 0.1                 | 1.05           | 0.35       | 0.2           | 1.70           |
| A3_Biosurfactant | 0.3                 | 1.05           | 1.05       | 0.6           | 3.00           |

## Decision-maker 2

**Table S4.** Completed alternative matrix for Decision-maker 2

| Alternatives     | Evaluation criteria |                |            |               |
|------------------|---------------------|----------------|------------|---------------|
|                  | C1-Management       | C2-Environment | C3-Economy | C4-Efficiency |
| A1_Biodiesel     | 3                   | 3              | 1          | 3             |
| A2_Biolubricant  | 1                   | 2              | 2          | 2             |
| A3_Biosurfactant | 2                   | 1              | 3          | 1             |

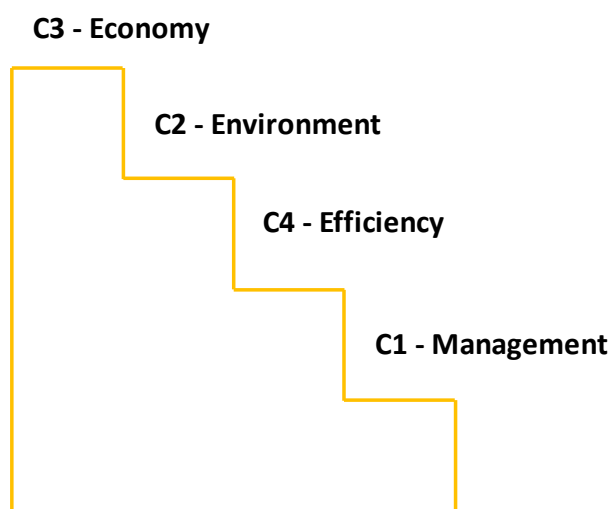

**Figure S2.** Priority Scale for Decision-maker 2

**Table S5.** Weights vector for Decision-maker 2

| Weights vector | Evaluation criteria |                |            |               |
|----------------|---------------------|----------------|------------|---------------|
|                | C1-Management       | C2-Environment | C3-Economy | C4-Efficiency |
| Values         | 0.1                 | 0.3            | 0.4        | 0.2           |

**Table S6.** Solved alternative matrix and Priority index for Decision-maker 2

| Alternatives     | Evaluation criteria |                |            |               | Priority index |
|------------------|---------------------|----------------|------------|---------------|----------------|
|                  | C1-Management       | C2-Environment | C3-Economy | C4-Efficiency |                |
| A1_Biodiesel     | 0.3                 | 0.9            | 0.4        | 0.6           | 2.20           |
| A2_Biolubricant  | 0.1                 | 0.6            | 0.8        | 0.4           | 1.90           |
| A3_Biosurfactant | 0.2                 | 0.3            | 1.2        | 0.2           | 1.90           |

### Decision-maker 3

**Table S7.** Completed alternative matrix for Decision-maker 3

| Alternatives     | Evaluation criteria |                |            |               |
|------------------|---------------------|----------------|------------|---------------|
|                  | C1-Management       | C2-Environment | C3-Economy | C4-Efficiency |
| A1_Biodiesel     | 1                   | 1              | 1          | 1             |
| A2_Biolubricant  | 2                   | 2              | 2          | 2             |
| A3_Biosurfactant | 2                   | 2              | 2          | 3             |

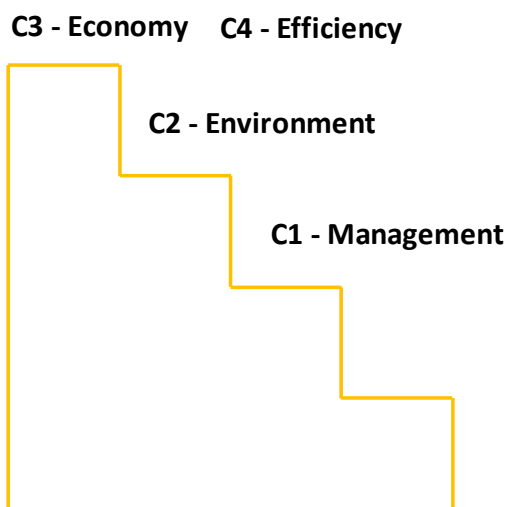

**Figure S3.** Priority Scale for Decision-maker 3

**Table S8.** Weights vector for Decision-maker 3

| Weights vector | Evaluation criteria |                |            |               |
|----------------|---------------------|----------------|------------|---------------|
|                | C1-Management       | C2-Environment | C3-Economy | C4-Efficiency |
| Values         | 0.1                 | 0.2            | 0.35       | 0.35          |

**Table S9.** Solved alternative matrix and Priority index for Decision-maker 3

| Alternatives     | Evaluation criteria |                |            |               | Priority index |
|------------------|---------------------|----------------|------------|---------------|----------------|
|                  | C1-Management       | C2-Environment | C3-Economy | C4-Efficiency |                |
| A1_Biodiesel     | 0.1                 | 0.2            | 0.35       | 0.35          | 1.00           |
| A2_Biolubricant  | 0.2                 | 0.4            | 0.7        | 0.7           | 2.00           |
| A3_Biosurfactant | 0.2                 | 0.4            | 0.7        | 1.05          | 2.35           |

## Decision-maker 4

**Table S10.** Completed alternative matrix for Decision-maker 4

| Alternatives     | Evaluation criteria |                |            |               |
|------------------|---------------------|----------------|------------|---------------|
|                  | C1-Management       | C2-Environment | C3-Economy | C4-Efficiency |
| A1_Biodiesel     | 2                   | 1              | 1          | 1             |
| A2_Biolubricant  | 1                   | 2              | 2          | 2             |
| A3_Biosurfactant | 3                   | 3              | 3          | 3             |

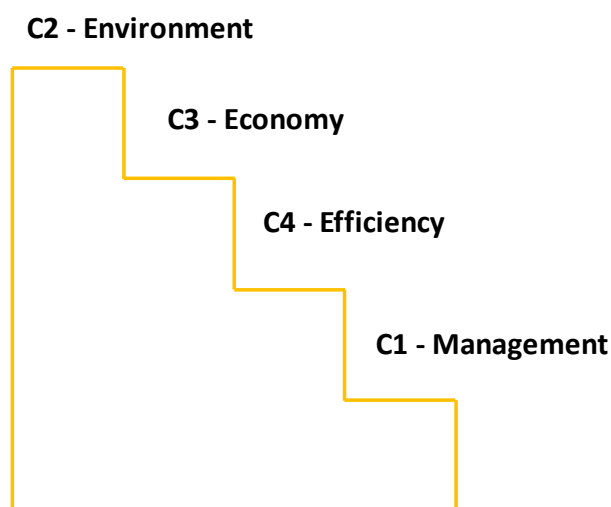

**Figure S4.** Priority Scale for Decision-maker 4

**Table S11.** Weights vector for Decision-maker 4

| Weights vector | Evaluation criteria |                |            |               |
|----------------|---------------------|----------------|------------|---------------|
|                | C1-Management       | C2-Environment | C3-Economy | C4-Efficiency |
| Values         | 0.1                 | 0.4            | 0.3        | 0.2           |

**Table S12.** Solved alternative matrix and Priority index for Decision-maker 4

| Alternatives     | Evaluation criteria |                |            |               | Priority index |
|------------------|---------------------|----------------|------------|---------------|----------------|
|                  | C1-Management       | C2-Environment | C3-Economy | C4-Efficiency |                |
| A1_Biodiesel     | 0.2                 | 0.4            | 0.3        | 0.2           | 1.10           |
| A2_Biolubricant  | 0.1                 | 0.8            | 0.6        | 0.4           | 1.90           |
| A3_Biosurfactant | 0.3                 | 1.2            | 0.9        | 0.6           | 3.00           |

## Decision-maker 5

**Table S13.** Completed alternative matrix for Decision-maker 5

| Alternatives     | Evaluation criteria |                |            |               |
|------------------|---------------------|----------------|------------|---------------|
|                  | C1-Management       | C2-Environment | C3-Economy | C4-Efficiency |
| A1_Biodiesel     | 2                   | 1              | 2          | 3             |
| A2_Biolubricant  | 3                   | 3              | 3          | 2             |
| A3_Biosurfactant | 3                   | 3              | 3          | 1             |

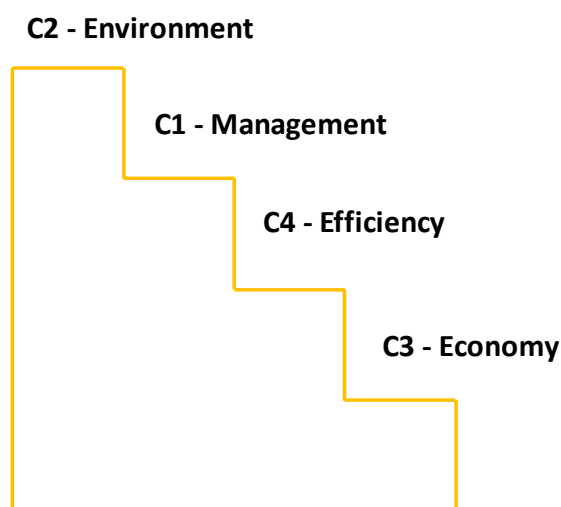

**Figure S5.** Priority Scale for Decision-maker 5

**Table S14.** Weights vector for Decision-maker 5

| Weights vector | Evaluation criteria |                |            |               |
|----------------|---------------------|----------------|------------|---------------|
|                | C1-Management       | C2-Environment | C3-Economy | C4-Efficiency |
| Values         | 0.3                 | 0.4            | 0.1        | 0.2           |

**Table S15.** Solved alternative matrix and Priority index for Decision-maker 5

| Alternatives     | Evaluation criteria |                |            |               | Priority index |
|------------------|---------------------|----------------|------------|---------------|----------------|
|                  | C1-Management       | C2-Environment | C3-Economy | C4-Efficiency |                |
| A1_Biodiesel     | 0.6                 | 0.4            | 0.2        | 0.6           | 1.80           |
| A2_Biolubricant  | 0.9                 | 1.2            | 0.3        | 0.4           | 2.80           |
| A3_Biosurfactant | 0.9                 | 1.2            | 0.3        | 0.2           | 2.60           |

## Decision-maker 6

**Table S16.** Completed alternative matrix for Decision-maker 6

| Alternatives     | Evaluation criteria |                |            |               |
|------------------|---------------------|----------------|------------|---------------|
|                  | C1-Management       | C2-Environment | C3-Economy | C4-Efficiency |
| A1_Biodiesel     | 2                   | 1              | 1          | 1             |
| A2_Biolubricant  | 2                   | 2              | 1          | 2             |
| A3_Biosurfactant | 3                   | 3              | 2          | 2             |

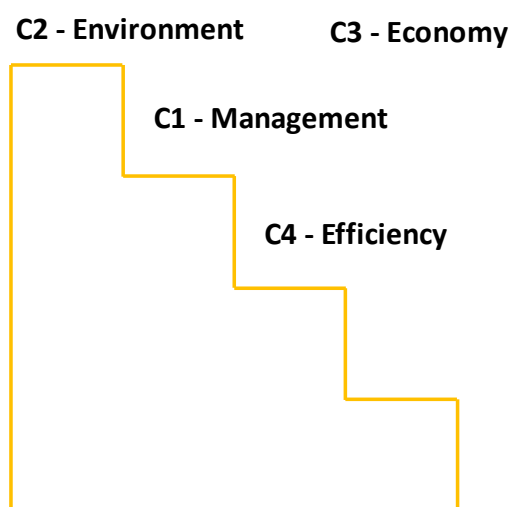

**Figure S6.** Priority Scale for Decision-maker 6

**Table S17.** Weights vector for Decision-maker 6

| Weights vector | Evaluation criteria |                |            |               |
|----------------|---------------------|----------------|------------|---------------|
|                | C1-Management       | C2-Environment | C3-Economy | C4-Efficiency |
| Values         | 0.2                 | 0.35           | 0.35       | 0.1           |

**Table S18.** Solved alternative matrix and Priority index for Decision-maker 6

| Alternatives     | Evaluation criteria |                |            |               | Priority index |
|------------------|---------------------|----------------|------------|---------------|----------------|
|                  | C1-Management       | C2-Environment | C3-Economy | C4-Efficiency |                |
| A1_Biodiesel     | 0.4                 | 0.35           | 0.35       | 0.1           | 1.20           |
| A2_Biolubricant  | 0.4                 | 0.7            | 0.35       | 0.2           | 1.65           |
| A3_Biosurfactant | 0.6                 | 1.05           | 0.7        | 0.2           | 2.55           |

## Decision-maker 7

**Table S19.** Completed alternative matrix for Decision-maker 7

| Alternatives     | Evaluation criteria |                |            |               |
|------------------|---------------------|----------------|------------|---------------|
|                  | C1-Management       | C2-Environment | C3-Economy | C4-Efficiency |
| A1_Biodiesel     | 2                   | 1              | 1          | 3             |
| A2_Biolubricant  | 3                   | 2              | 1          | 1             |
| A3_Biosurfactant | 3                   | 3              | 2          | 3             |

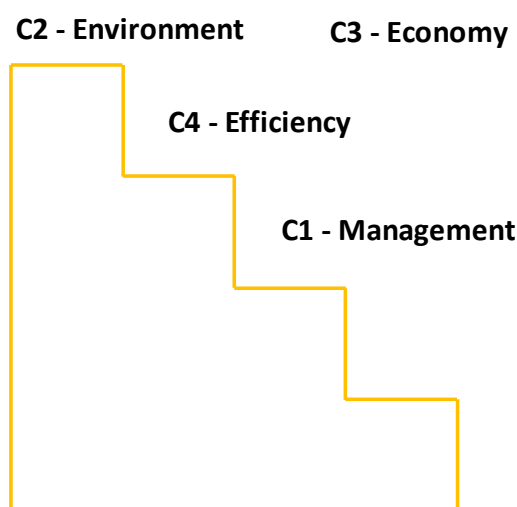

**Figure S7.** Priority Scale for Decision-maker 7

**Table S20.** Weights vector for Decision-maker 7

| Weights vector | Evaluation criteria |                |            |               |
|----------------|---------------------|----------------|------------|---------------|
|                | C1-Management       | C2-Environment | C3-Economy | C4-Efficiency |
| Values         | 0.1                 | 0.35           | 0.35       | 0.2           |

**Table S21.** Solved alternative matrix and Priority index for Decision-maker 7

| Alternatives     | Evaluation criteria |                |            |               | Priority index |
|------------------|---------------------|----------------|------------|---------------|----------------|
|                  | C1-Management       | C2-Environment | C3-Economy | C4-Efficiency |                |
| A1_Biodiesel     | 0.2                 | 0.35           | 0.35       | 0.6           | 1.50           |
| A2_Biolubricant  | 0.3                 | 0.7            | 0.35       | 0.2           | 1.55           |
| A3_Biosurfactant | 0.3                 | 1.05           | 0.7        | 0.6           | 2.65           |

## Decision-maker 8

**Table S22.** Completed alternative matrix for Decision-maker 8

| Alternatives     | Evaluation criteria |                |            |               |
|------------------|---------------------|----------------|------------|---------------|
|                  | C1-Management       | C2-Environment | C3-Economy | C4-Efficiency |
| A1_Biodiesel     | 1                   | 3              | 2          | 3             |
| A2_Biolubricant  | 2                   | 1              | 2          | 2             |
| A3_Biosurfactant | 3                   | 2              | 3          | 2             |

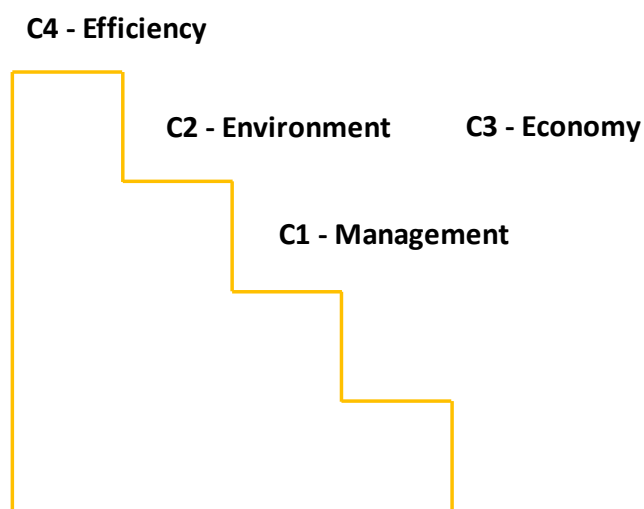

**Figure S8.** Priority Scale for Decision-maker 8

**Table S23.** Weights vector for Decision-maker 8

| Weights vector | Evaluation criteria |                |            |               |
|----------------|---------------------|----------------|------------|---------------|
|                | C1-Management       | C2-Environment | C3-Economy | C4-Efficiency |
| Values         | 0.1                 | 0.25           | 0.25       | 0.4           |

**Table S24.** Solved alternative matrix and Priority index for Decision-maker 8

| Alternatives     | Evaluation criteria |                |            |               | Priority index |
|------------------|---------------------|----------------|------------|---------------|----------------|
|                  | C1-Management       | C2-Environment | C3-Economy | C4-Efficiency |                |
| A1_Biodiesel     | 0.1                 | 0.75           | 0.5        | 1.2           | 2.55           |
| A2_Biolubricant  | 0.2                 | 0.25           | 0.5        | 0.8           | 1.75           |
| A3_Biosurfactant | 0.3                 | 0.5            | 0.75       | 0.8           | 2.35           |

## Decision-maker 9

**Table S25.** Completed alternative matrix for Decision-maker 9

| Alternatives     | Evaluation criteria |                |            |               |
|------------------|---------------------|----------------|------------|---------------|
|                  | C1-Management       | C2-Environment | C3-Economy | C4-Efficiency |
| A1_Biodiesel     | 1                   | 1              | 1          | 2             |
| A2_Biolubricant  | 3                   | 3              | 3          | 2             |
| A3_Biosurfactant | 3                   | 2              | 3          | 3             |

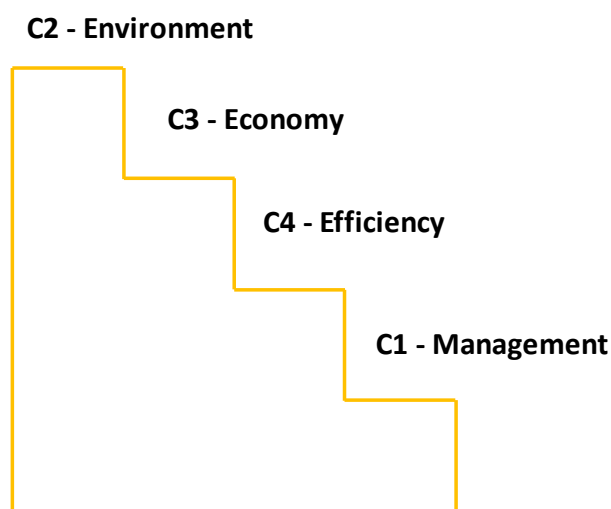

**Figure S9.** Priority Scale for Decision-maker 9

**Table S26.** Weights vector for Decision-maker 9

| Weights vector | Evaluation criteria |                |            |               |
|----------------|---------------------|----------------|------------|---------------|
|                | C1-Management       | C2-Environment | C3-Economy | C4-Efficiency |
| Values         | 0.1                 | 0.4            | 0.3        | 0.2           |

**Table S27.** Solved alternative matrix and Priority index for Decision-maker 9

| Alternatives     | Evaluation criteria |                |            |               | Priority index |
|------------------|---------------------|----------------|------------|---------------|----------------|
|                  | C1-Management       | C2-Environment | C3-Economy | C4-Efficiency |                |
| A1_Biodiesel     | 0.1                 | 0.4            | 0.3        | 0.4           | 1.20           |
| A2_Biolubricant  | 0.3                 | 1.2            | 0.9        | 0.4           | 2.80           |
| A3_Biosurfactant | 0.3                 | 0.8            | 0.9        | 0.6           | 2.60           |

## Decision-maker 10

**Table S28.** Completed alternative matrix for Decision-maker 10

| Alternatives     | Evaluation criteria |                |            |               |
|------------------|---------------------|----------------|------------|---------------|
|                  | C1-Management       | C2-Environment | C3-Economy | C4-Efficiency |
| A1_Biodiesel     | 1                   | 2              | 2          | 2             |
| A2_Biolubricant  | 2                   | 3              | 2          | 2             |
| A3_Biosurfactant | 3                   | 3              | 2          | 2             |

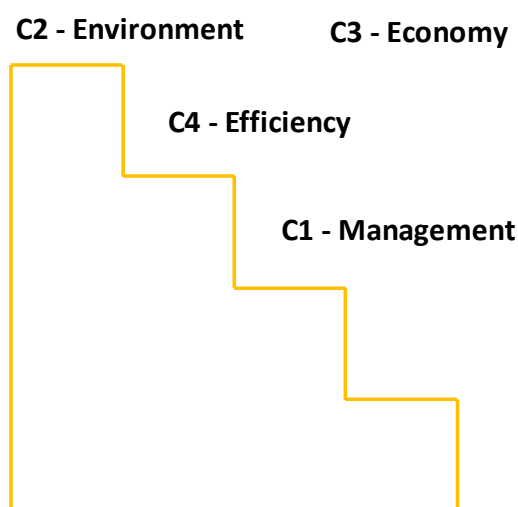

**Figure S10.** Priority Scale for Decision-maker 10

**Table S29.** Weights vector for Decision-maker 10

| Weights vector | Evaluation criteria |                |            |               |
|----------------|---------------------|----------------|------------|---------------|
|                | C1-Management       | C2-Environment | C3-Economy | C4-Efficiency |
| Values         | 0.1                 | 0.35           | 0.35       | 0.2           |

**Table S30.** Solved alternative matrix and Priority index for Decision-maker 10

| Alternatives     | Evaluation criteria |                |            |               | Priority index |
|------------------|---------------------|----------------|------------|---------------|----------------|
|                  | C1-Management       | C2-Environment | C3-Economy | C4-Efficiency |                |
| A1_Biodiesel     | 0.1                 | 0.7            | 0.7        | 0.4           | 1.90           |
| A2_Biolubricant  | 0.2                 | 1.05           | 0.7        | 0.4           | 2.35           |
| A3_Biosurfactant | 0.3                 | 1.05           | 0.7        | 0.4           | 2.45           |
